# Supplementary material for: A new fluorescent probe based on styrylcyanine dye containing pyridine: dissimilar fluorescent response to Cu2+ and Pb2+
Source: Royal Society of Chemistry journal article supplement (doi:10.1039/c4ra02738h), 2014-01-01
Supplement: c4ra02738h1.pdf [file c4ra02738h1.pdf]

## **Supporting Information**

*for*

### **A New Fluorescent Probe based on Styrylcyanine Dye Containing Pyridine: Dissimilar Fluorescent Response to Cu<sup>2+</sup> and Pb<sup>2+</sup>**

*Xiaodong Yang,<sup>b</sup> Weifeng Zeng,<sup>b</sup> Lei Wang,<sup>b</sup> Xinwei Lu,<sup>a</sup> Yichen Yan,<sup>a</sup> Jinqing Qu,<sup>\*b</sup>*

*Ruiyuan Liu<sup>\*,a</sup>*

a School of Pharmaceutical Science, Southern Medical University, Guangzhou 510515, P.R. China. Fax: 86-020-61648196; Tel: 86-020-61648196; E-mail: ruiyliu@smu.edu.cn

b School of Chemistry and Chemical Engineering, South China University of Technology, Guangzhou 510640, P.R.China. E-mail: cejqqu@scut.edu.cn

## Contents

**Figure S1.**  $^1\text{H}$  NMR spectrum of **1** in  $\text{DMSO-}d_6$ .

**Figure S2.**  $^{13}\text{C}$  NMR spectrum of **1** in  $\text{DMSO-}d_6$ .

**Figure S3.** IR spectrum of **1**

**Figure S4.** ESI-MS spectrum of **1**

**Figure S5.** Partial  $^1\text{H}$  NMR spectra of **1** upon addition of  $\text{Pb}^{2+}$  in  $\text{DMSO-}d_6$ .(a)

$[\text{Pb}^{2+}]/[\mathbf{1}] = 0$ , (b)  $[\text{Pb}^{2+}]/[\mathbf{1}] = 0.5$ ,  $[\text{Pb}^{2+}]/[\mathbf{1}] = 1$ .

**Figure S6.** Absorption spectra of **1** ( $30\ \mu\text{M}$ ) after addition of various metal ions ( $\text{Cu}^{2+}$ ,  $\text{Pb}^{2+}$ ,  $\text{Ca}^{2+}$ ,  $\text{Hg}^{2+}$ ,  $\text{K}^+$ ,  $\text{Fe}^{2+}$ ,  $\text{Co}^{2+}$ ,  $\text{Ag}^+$ ,  $\text{Mg}^{2+}$ ,  $\text{Mn}^{2+}$ ,  $\text{Na}^+$ ) in  $\text{CH}_3\text{CN}/\text{water}$  mixture (9:1, v/v) ( $[\text{metal ion}] = 150\ \mu\text{M}$ ).

**Figure S7.** Fluorescent spectra of **1** ( $30\ \mu\text{M}$ ) containing  $\text{Cu}^{2+}$  upon addition of various competing metal ions ( $\text{Pb}^{2+}$ ,  $\text{Ca}^{2+}$ ,  $\text{Hg}^{2+}$ ,  $\text{K}^+$ ,  $\text{Fe}^{2+}$ ,  $\text{Co}^{2+}$ ,  $\text{Ag}^+$ ,  $\text{Mg}^{2+}$ ,  $\text{Mn}^{2+}$ ,  $\text{Na}^+$ ) in  $\text{CH}_3\text{CN}/\text{water}$  mixture (9:1, v/v) ( $[\mathbf{1}] = 30\ \mu\text{M}$ ,  $[\text{Cu}^{2+}] = [\text{other metal ion}] = 150\ \mu\text{M}$ ).

**Figure S8.** Fluorescence intensities of (a) **1** ( $30\ \mu\text{M}$ ) in  $\text{CH}_3\text{CN}/\text{water}$  mixture (9:1, v/v) with  $150\ \mu\text{M}$   $\text{Cu}^{2+}$  in the presence of competing metal ions. Black bars; **1** ( $30\ \mu\text{M}$ ) in  $\text{CH}_3\text{CN}/\text{water}$  mixture (9:1, v/v) with  $150\ \mu\text{M}$  of stated metal ions. Slant bars; **1** ( $30\ \mu\text{M}$ ) in  $\text{CH}_3\text{CN}/\text{water}$  mixture (9:1, v/v) with  $150\ \mu\text{M}$   $\text{Cu}^{2+}$  +  $150\ \mu\text{M}$  of stated metal ions.

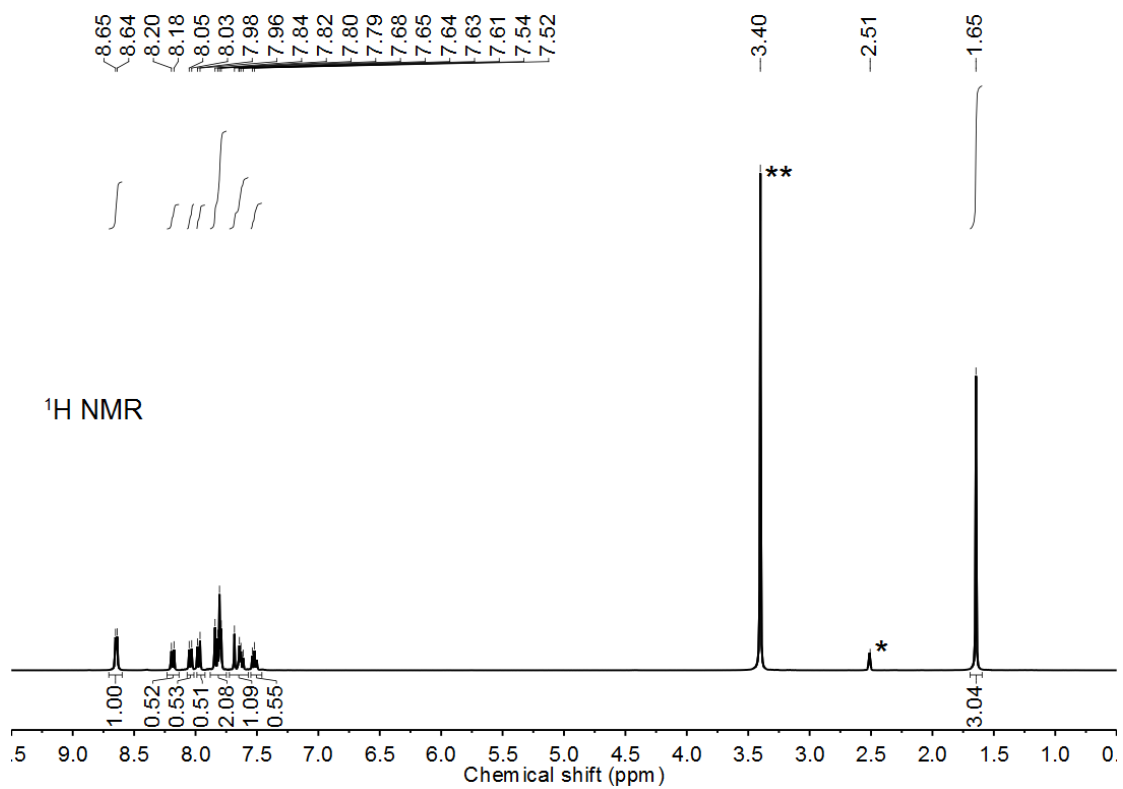

**Figure S1.** <sup>1</sup>H NMR spectrum of **1** in DMSO-*d*<sub>6</sub>.

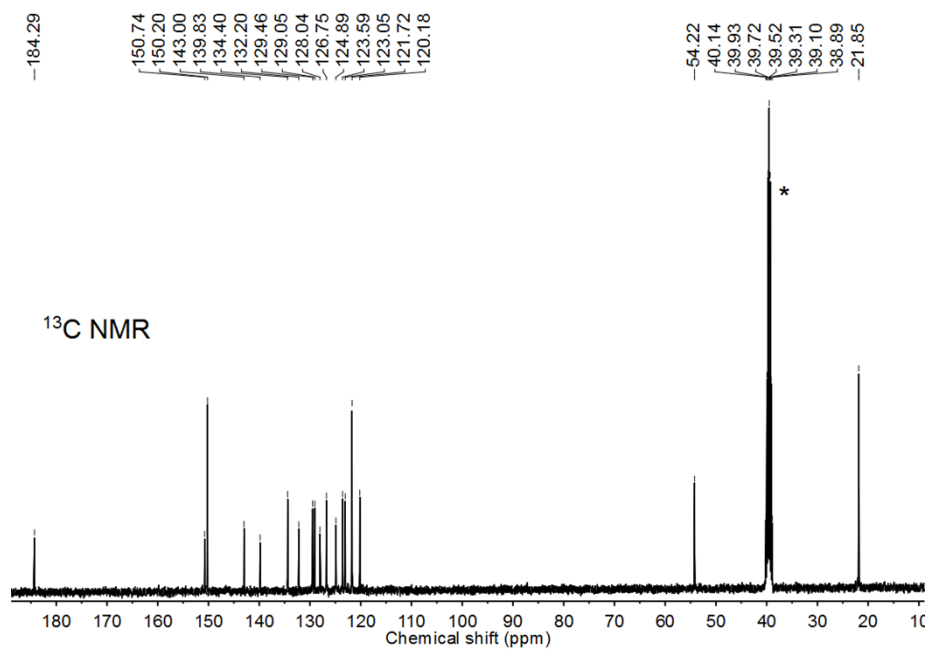

**Figure S2.** <sup>13</sup>C NMR spectrum of **1** in DMSO-*d*<sub>6</sub>

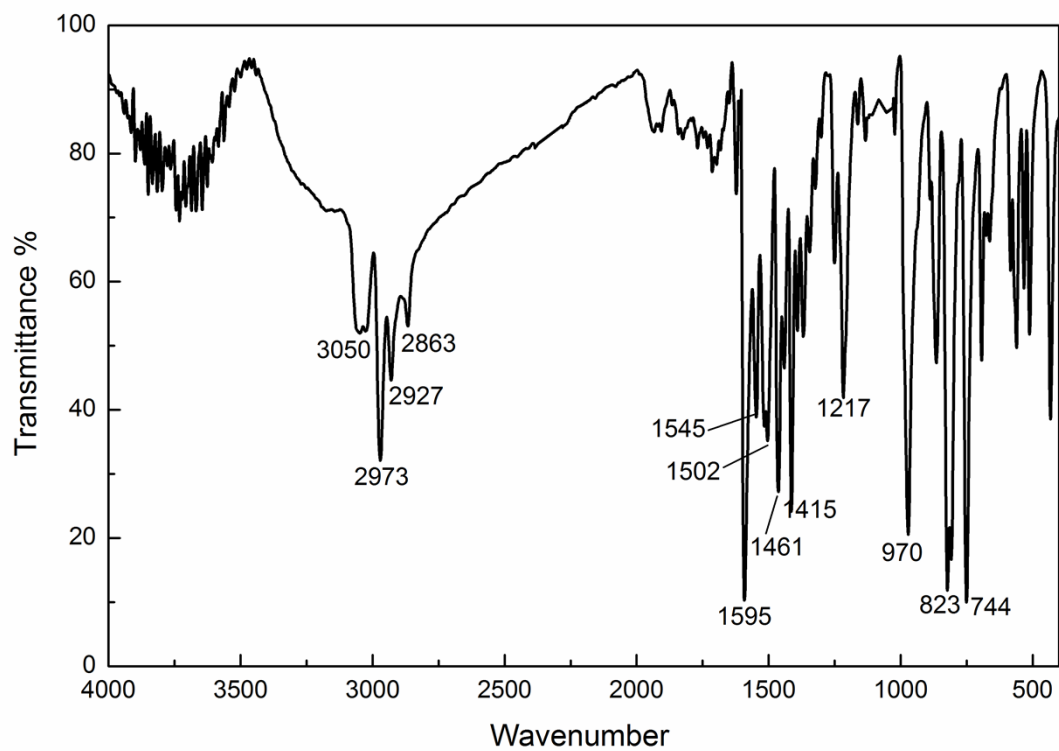

**Figure S3.** IR spectrum of **1**

## Generic Display Report

### Analysis Info

Analysis Name D:\Data\2013\10\13100905\13100905-1\_P1-C-3\_01\_410.d  
Method ESI\_Pos\_50-1000\_For 2 min Injection\_With Calibration.m  
Sample Name 13100905-1  
Comment

Acquisition Date 10/9/2013 9:57:33 AM

Operator BDAL@DE  
Instrument maXis impact

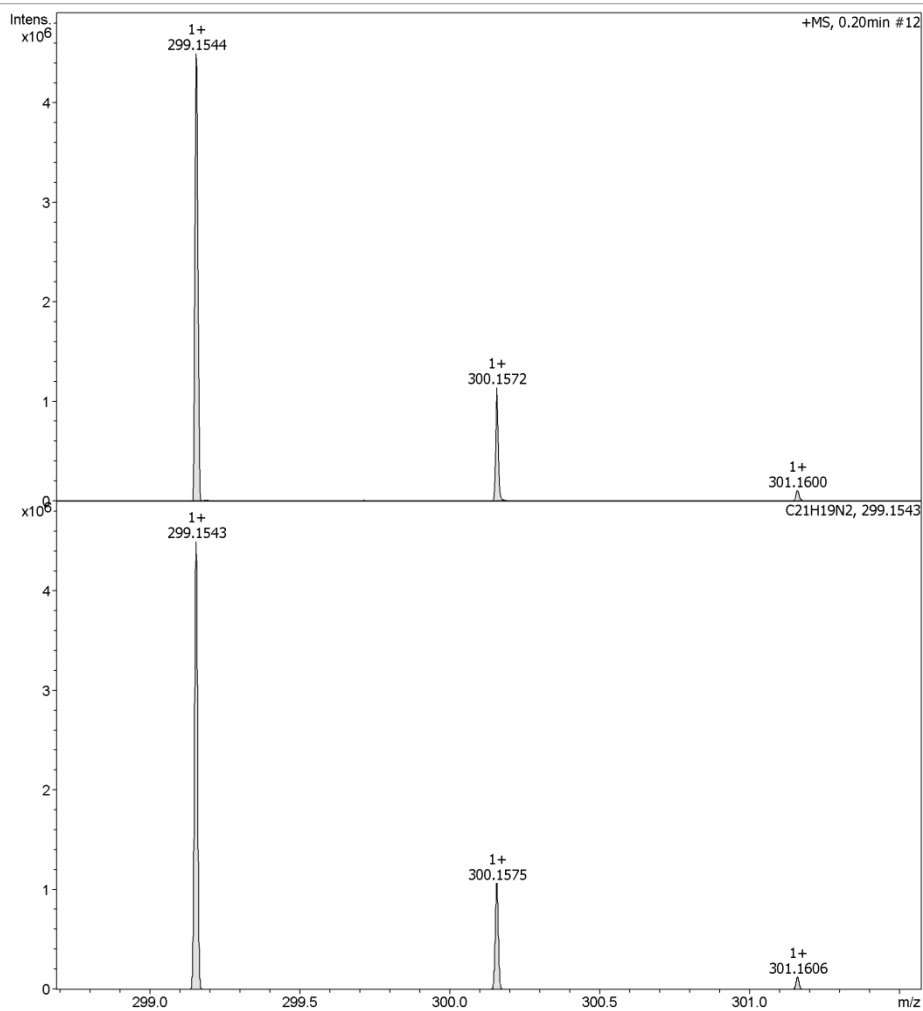

**Figure S4. ESI-MS spectrum of 1**

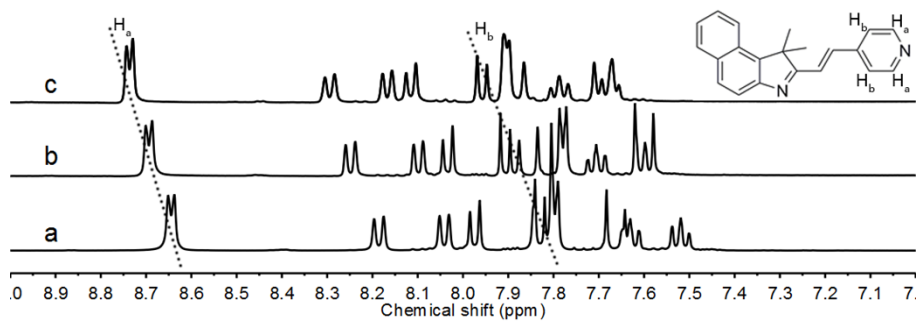

**Figure S5.** Partial  $^1\text{H}$  NMR spectra of **1** upon addition of  $\text{Pb}^{2+}$  in  $\text{DMSO-}d_6$ . (a)  $[\text{Pb}^{2+}]/[\mathbf{1}] = 0$ , (b)  $[\text{Pb}^{2+}]/[\mathbf{1}] = 0.5$ ,  $[\text{Pb}^{2+}]/[\mathbf{1}] = 1$ .

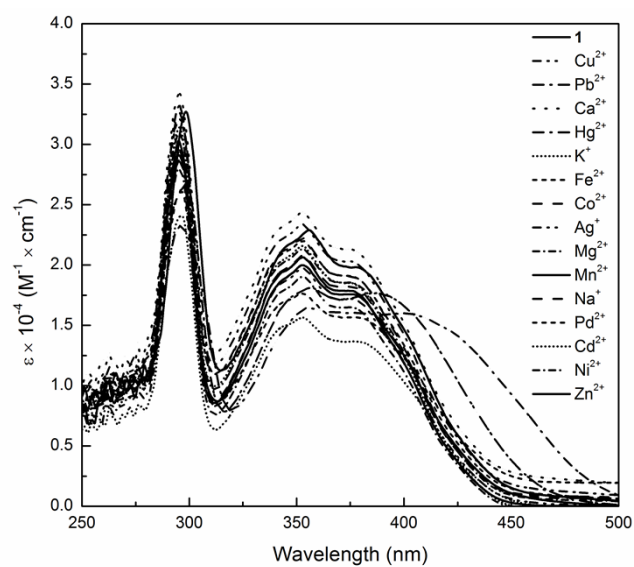

**Figure S6.** Absorption spectra of **1** (30  $\mu\text{M}$ ) after addition of various metal ions ( $\text{Cu}^{2+}$ ,  $\text{Pb}^{2+}$ ,  $\text{Ca}^{2+}$ ,  $\text{Hg}^{2+}$ ,  $\text{K}^+$ ,  $\text{Fe}^{2+}$ ,  $\text{Co}^{2+}$ ,  $\text{Ag}^+$ ,  $\text{Mg}^{2+}$ ,  $\text{Mn}^{2+}$ ,  $\text{Na}^+$ ,  $\text{Pd}^{2+}$ ,  $\text{Cd}^{2+}$ ,  $\text{Ni}^{2+}$ ,  $\text{Zn}^{2+}$ ) in  $\text{CH}_3\text{CN}/\text{water}$  mixture (9:1, v/v) ( $[\text{metal ion}] = 150 \mu\text{M}$ ).



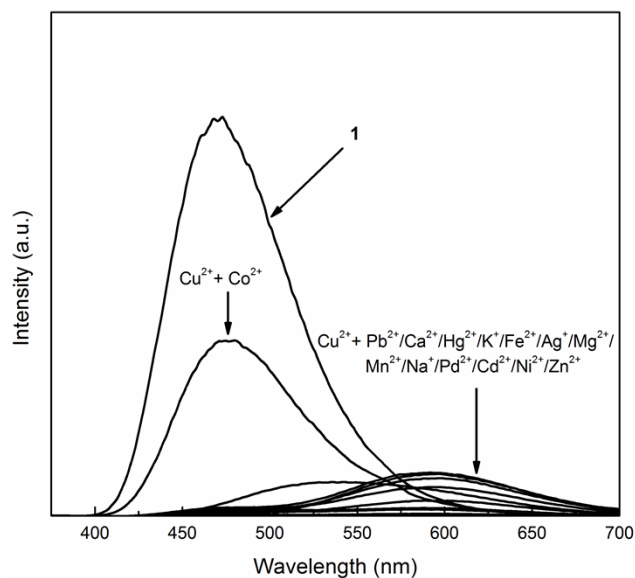

**Figure S7.** Fluorescent spectra of **1** (30  $\mu\text{M}$ ) containing  $\text{Cu}^{2+}$  upon addition of various competing metal ions ( $\text{Pb}^{2+}$ ,  $\text{Ca}^{2+}$ ,  $\text{Hg}^{2+}$ ,  $\text{K}^+$ ,  $\text{Fe}^{2+}$ ,  $\text{Co}^{2+}$ ,  $\text{Ag}^+$ ,  $\text{Mg}^{2+}$ ,  $\text{Mn}^{2+}$ ,  $\text{Na}^+$ ,  $\text{Pd}^{2+}$ ,  $\text{Cd}^{2+}$ ,  $\text{Ni}^{2+}$ ,  $\text{Zn}^{2+}$ ) in  $\text{CH}_3\text{CN}/\text{water}$  mixture (9:1, v/v) ( $[\mathbf{1}] = 30 \mu\text{M}$ ,  $[\text{Cu}^{2+}] = [\text{other metal ion}] = 150 \mu\text{M}$ ).

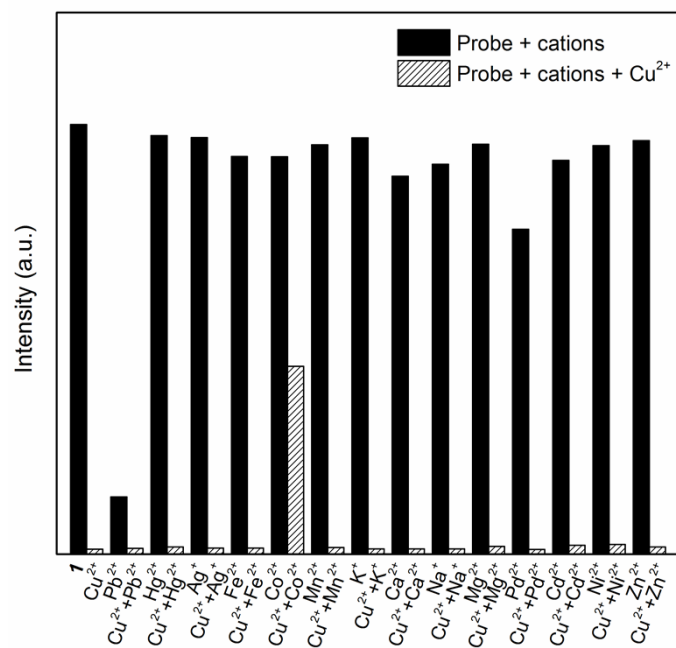

**Figure S8.** Fluorescence intensities of (a) **1** (30  $\mu\text{M}$ ) in  $\text{CH}_3\text{CN}/\text{water}$  mixture (9:1, v/v) with 150  $\mu\text{M}$   $\text{Cu}^{2+}$  in the presence of competing metal ions. Black bars; **1** (30  $\mu\text{M}$ ) in  $\text{CH}_3\text{CN}/\text{water}$  mixture (9:1, v/v) with 150  $\mu\text{M}$  of stated metal ions. Slant bars; **1** (30  $\mu\text{M}$ ) in  $\text{CH}_3\text{CN}/\text{water}$  mixture (9:1, v/v) with 150  $\mu\text{M}$   $\text{Cu}^{2+}$  + 150  $\mu\text{M}$  of stated metal ions.
